# Supplementary material for: Low Serum Vitamin D Status Is Associated with Incident Alzheimer’s Dementia in the Oldest Old
Source: MDPI journal article supplement (doi:10.3390/nu15010061), 2022-12-23
Supplement: s1 [file s1]

**Table S1:** Characteristics of the study participants

|                                                 | Main sample           |
|-------------------------------------------------|-----------------------|
|                                                 | n= 1,334              |
| Age (years)                                     | 84 ± 3                |
| Female (n, %)                                   | 861 (64.5)            |
| BMI (kg/m <sup>2</sup> )                        | 25.9 ± 3.7            |
| <i>Missing values (n, %)</i>                    | 30 (2.2)              |
| APOE ε4 allele (n, %)                           | 248 (18.6)            |
| <i>Missing values (n, %)</i>                    | 44 (3.3)              |
| Time to develop Alzheimer's dementia<br>(years) | 3 ± 2                 |
| Time to censoring (years)                       | 5 ± 2                 |
| Blood analyses                                  |                       |
| Vitamin A (mg/L)                                | 0.54 ± 0.23           |
| Beta-carotene (mg/L)                            | 0.32 (IQR: 0.22-0.48) |
| Vitamin D (nmol/L)                              | 37.0 (IQR: 24.8-58.3) |
| Vitamin E (mg/L)                                | 15.73 ± 6.33          |
| Creatinine (mg/dl)                              | 1.00 (IQR: 0.83-1.22) |
| <i>Missing values (n, %)</i>                    | 30 (2.2)              |
| Total cholesterol (g/L)                         | 2.21 ± 0.47           |
| <i>Missing values (n, %)</i>                    | 30 (2.2)              |
| Triglycerides (g/L)                             | 1.12 (IQR: 0.87-1.50) |
| <i>Missing values (n, %)</i>                    | 269 (20.1)            |
| Education (n, %)                                |                       |
| Lower                                           | 779 (58.4)            |
| Middle                                          | 396 (29.7)            |
| High                                            | 159 (11.9)            |

**(Continued) Table S1:** Characteristics of the study participants

|                                       |                 |
|---------------------------------------|-----------------|
| Physical activity (n, %)              |                 |
| Low (0-1)                             | 111 (8.3)       |
| Middle (2)                            | 892 (66.9)      |
| High (3-5)                            | 303 (22.7)      |
| <i>Missing values (n, %)</i>          | 28 (2.1)        |
| Smoking (n, %)                        |                 |
| Never                                 | 681 (51.0)      |
| Past                                  | 569 (42.7)      |
| Current                               | 84 (6.3)        |
| Vitamin supplement intake (n, %)      | 79 (5.9)        |
| <i>Missing values (n, %)</i>          | 21 (1.6)        |
| Systolic blood pressure (mmHg)        | 136 ± 16        |
| <i>Missing values (n, %)</i>          | 74 (5.5)        |
| Diastolic blood pressure (mmHg)       | 80 (IQR: 70-80) |
| <i>Missing values (n, %)</i>          | 74 (5.5)        |
| ACE inhibitors usage (n, %)           | 47 (3.5)        |
| Calcium channel blockers usage (n, %) | 5 (0.4)         |
| Ginkgo biloba usage (n, %)            | 10 (0.8)        |
| Laxative usage (n, %)                 | 9 (0.9)         |

Values are means ± SD, numbers (valid percentages), or medians (interquartile range). Abbreviations:

AgeCoDe, German Study on Ageing, Cognition and Dementia in Primary Care Patients; APOE ε4, apolipoprotein ε4; g, grams; n, number; mmHg, millimeter of mercury.

**Table S2.** Specification of the multiple imputation procedure

|                                                                                       |                                                                                                                                                                                                                                                                                                                                                                                                               |
|---------------------------------------------------------------------------------------|---------------------------------------------------------------------------------------------------------------------------------------------------------------------------------------------------------------------------------------------------------------------------------------------------------------------------------------------------------------------------------------------------------------|
| Software                                                                              | IBM SPSS Statistics for Windows (Release 21.0.0.1)                                                                                                                                                                                                                                                                                                                                                            |
| Imputation method                                                                     | Fully conditional specification (Markov chain Monte Carlo method)                                                                                                                                                                                                                                                                                                                                             |
| Key settings                                                                          | Maximum iterations: 20                                                                                                                                                                                                                                                                                                                                                                                        |
| Imputed data sets                                                                     | 10                                                                                                                                                                                                                                                                                                                                                                                                            |
| Variables included in the imputation procedure                                        | Dementia at baseline; age at baseline; participated in follow up 3<br>vitamin A (mg/L); Beta-carotene (mg/L); vitamin D (mmol/L); vitamin E (mg/L); CERAD (baseline-FU3); Follow up 3 aggregated:                                                                                                                                                                                                             |
| (imputed or used as predictors of missing                                             | Healthy controls, MCI, dementia variable; Incident Alzheimer's dementia FU8; incident dementia FU8; vascular dementia FU8; time variable; sex; age at FU3; Apolipoprotein e4; education; body weight (kg); height (cm); smoking; creatinine; cholesterol; triglycerides; systolic blood pressure; diastolic blood pressure; depression; physical activity; vitamin supplement intake; month of blood drawing. |
| Additionally added predictive variables to increase plausibility of missing at random | body weight at FU4 (kg); height at FU4 (cm); ability to conduct chorus around the house FU3; hypertension FU3; diabetes mellitus type I and II FU3; kidney failure FU3; lipids and cholesterol combined FU3; hypertension FU3; medication use FU2 and FU3                                                                                                                                                     |
| Not normally distributed variables were treated with:                                 | Predictive mean matching                                                                                                                                                                                                                                                                                                                                                                                      |
| Binary/categorical variables were treated with:                                       | Logistic regression models                                                                                                                                                                                                                                                                                                                                                                                    |

Abbreviations: FU= follow up visit

**Table S3:** Longitudinal associations between blood (serum/plasma) concentrations of vitamins A, D and E and beta-carotene and incident vascular dementia over a 7-year follow up period (n=1,334)

|                            | Incident vascular dementia (n=41 cases) |          |                     |          |
|----------------------------|-----------------------------------------|----------|---------------------|----------|
|                            | Model 1                                 |          | Model 2             |          |
| <b>Vitamins</b>            | <i>HR</i> (95 % CI)                     | <i>P</i> | <i>HR</i> (95 % CI) | <i>P</i> |
| Vitamin A (mg/L)           | 1.84 (0.61; 5.54)                       | 0.276    | 2.19 (0.77; 6.30)   | 0.144    |
| Beta-carotene (mg/L)       | 1.01 (0.37; 2.75)                       | 0.992    | 1.21 (0.44; 3.30)   | 0.711    |
| Vitamin E (mg/L)           | 0.98 (0.93; 1.03)                       | 0.376    | 0.98 (0.92; 1.04)   | 0.469    |
| Vitamin D (mmol/L)         | 1.01 (0.99; 1.02)                       | 0.324    | 1.01 (0.99; 1.02)   | 0.461    |
| <b>Vitamin D cut-offs</b>  |                                         |          |                     |          |
| ≥50 (mmol/L) (n=449)       | <i>Reference</i>                        |          | <i>Reference</i>    |          |
| ≥25 -<50 (mmol/L) (n= 548) | 0.30 (0.13; 0.71)                       | 0.006    | 0.31 (0.12; 0.78)   | 0.013    |
| <25 (mmol/L) (n= 337)      | 0.96 (0.48; 1.91)                       | 0.910    | 0.91 (0.38; 2.15)   | 0.823    |

Based on imputed data. Abbreviations: *APOE* ε4, apolipoprotein ε4; CI= confidence interval; HR, hazard ratio. Model 1 is adjusted for age, sex, *APOE* ε4 and education. Model 2 is adjusted as for model 1, plus BMI, physical activity and smoking, memory decline before study baseline, total cholesterol, creatinine, systolic blood pressure, diastolic blood pressure and vitamin supplement intake (in addition for vitamin D: vitamin D supplement intake and month of blood draw). A P-value <0.05 is considered to be statistically significant.

**Vitamin D status among participants who developed dementia (n=250)**

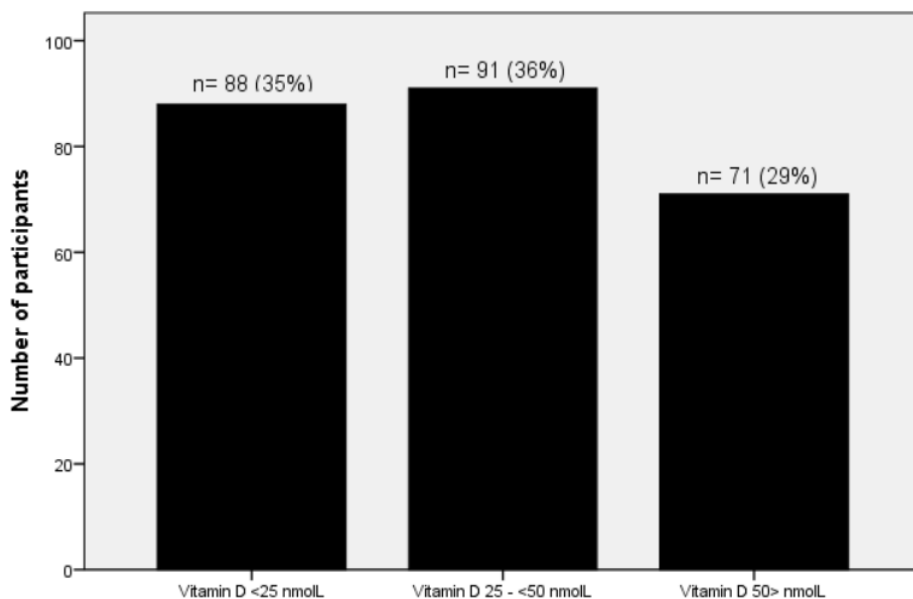

**Figure S1.** Vitamin D status at visit 3 among participants who developed all-cause dementia during follow-up.

**Vitamin D status among participants who did not develop dementia (n= 1084)**

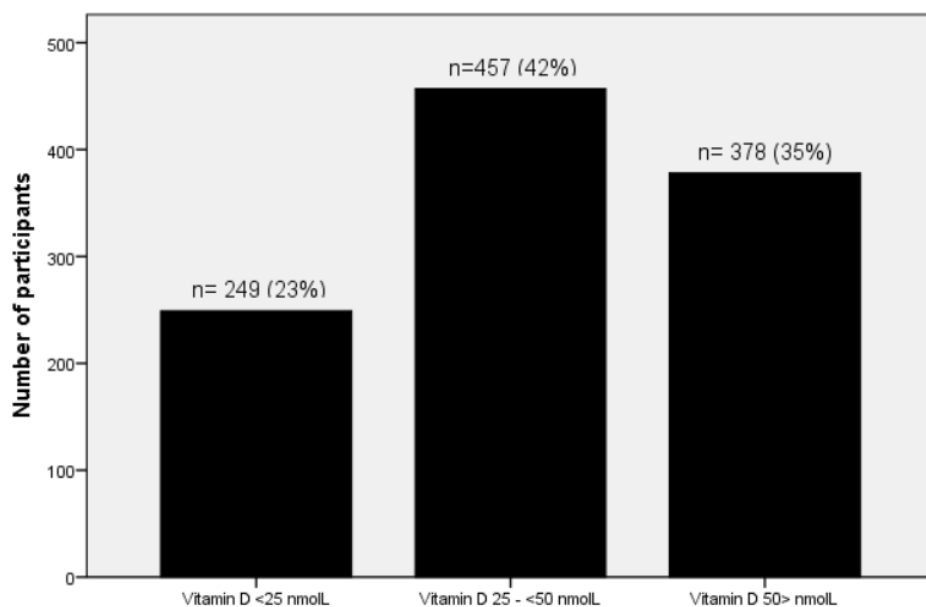

**Figure S2.** Vitamin D status at visit 3 among participants who did not develop all-cause dementia during follow-up.
